# Supplementary material
Source: publisher site journal article supplement (https://www.dovepress.com/article/418885)

**Figure S1 Patient selection flow diagram.**
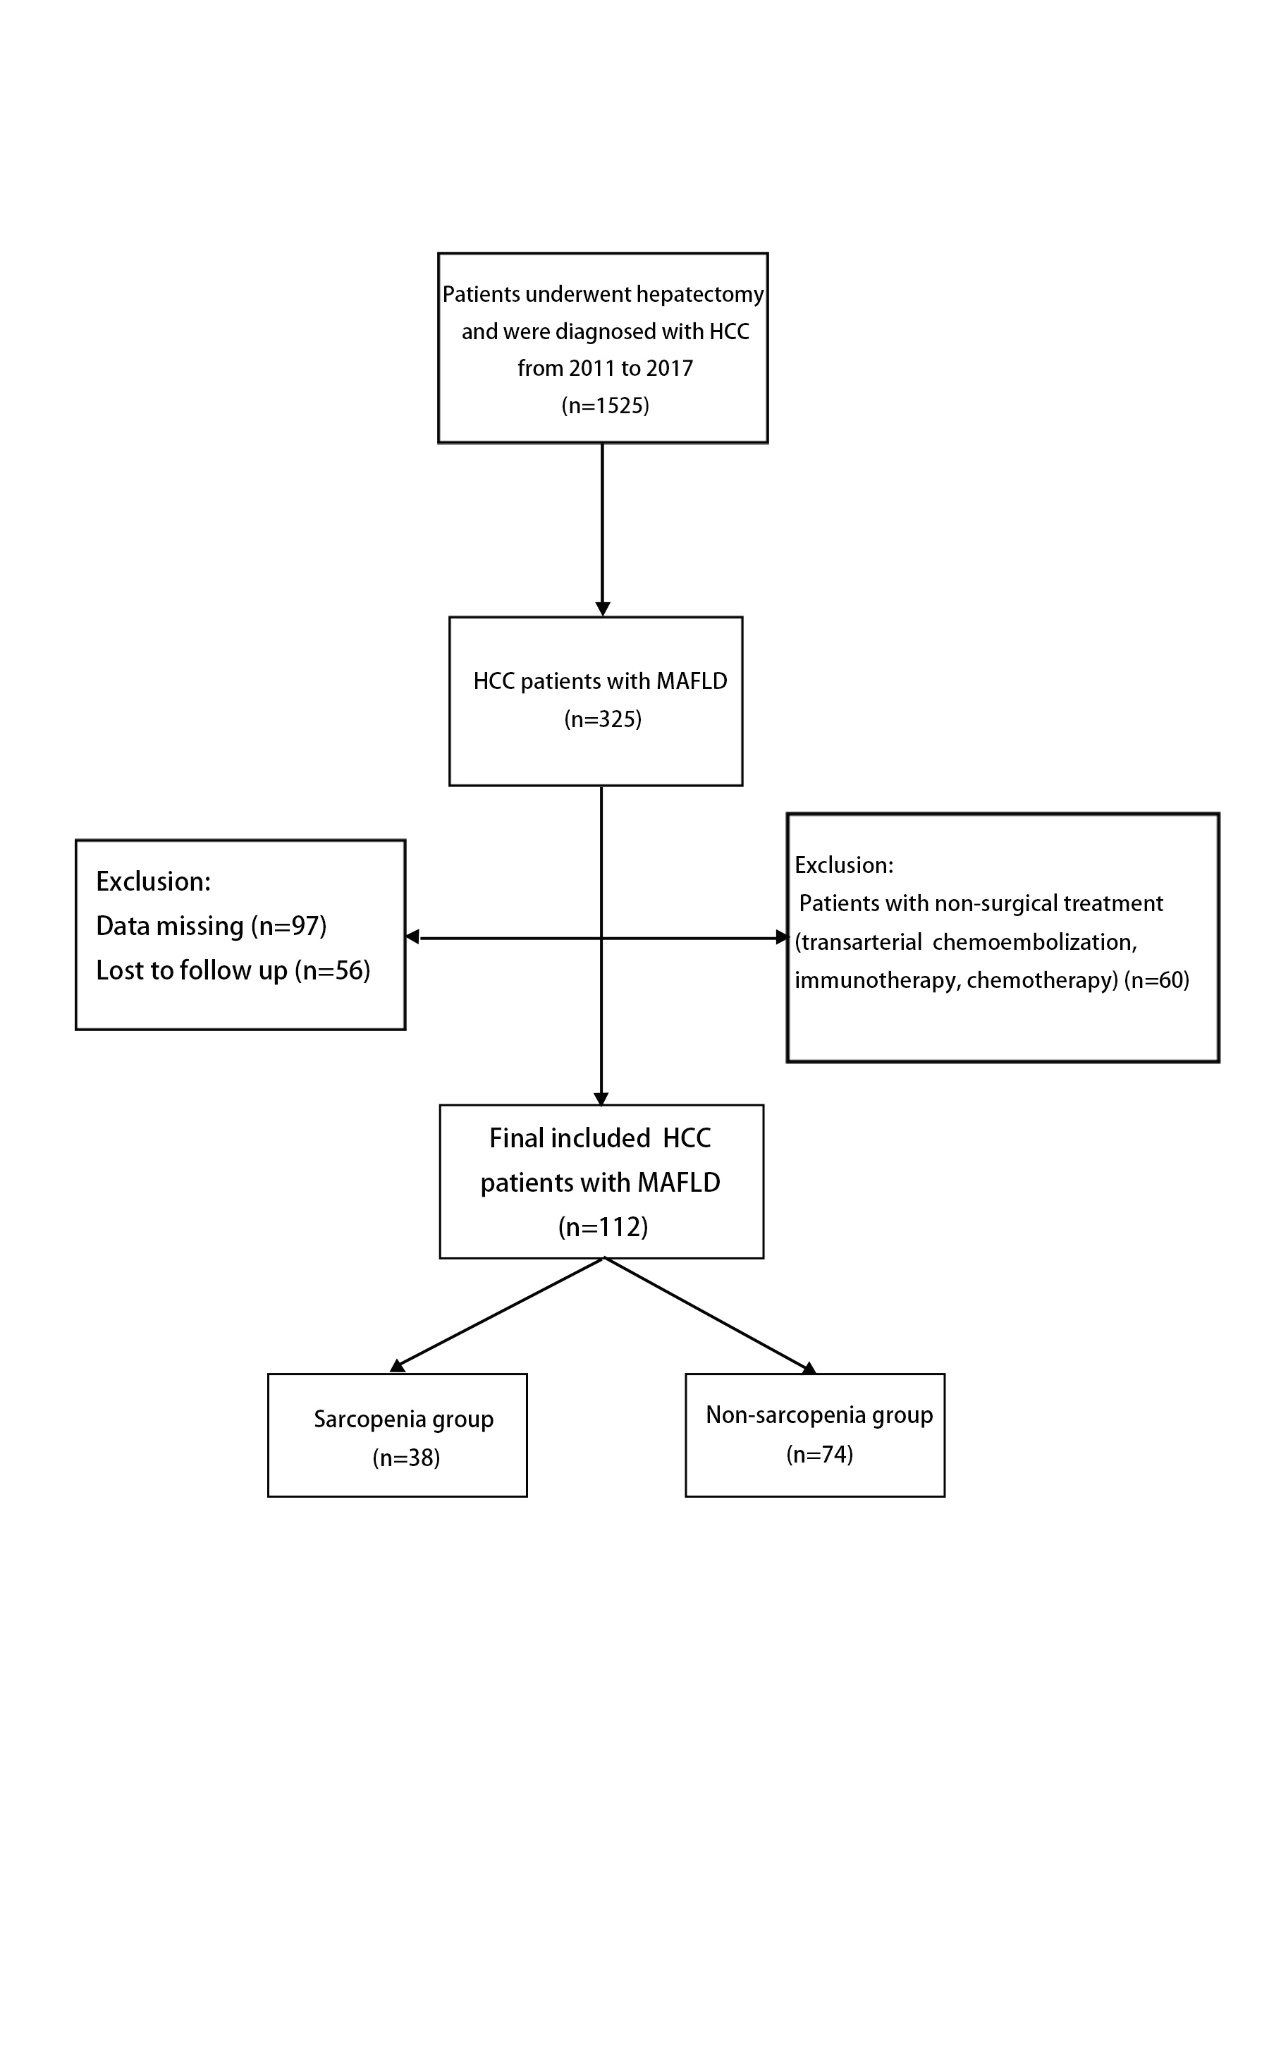
 **Figure** **S2 RFS (E) and OS (F) in MAFLD-HCC patients for subgroup analysis: the lean/normal weight group (BMI＜23 kg/m2) and the overweight group(BMI ≥23 kg/m2).**


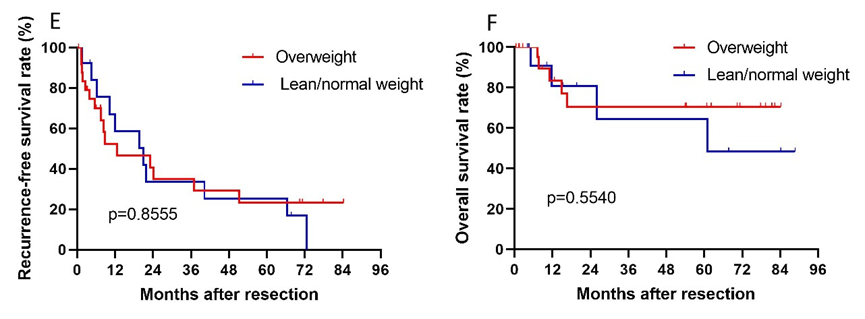


**Figure S3 RFS (G) and OS (H) in MAFLD-HCC patients for subgroup analysis with or without T2D.**


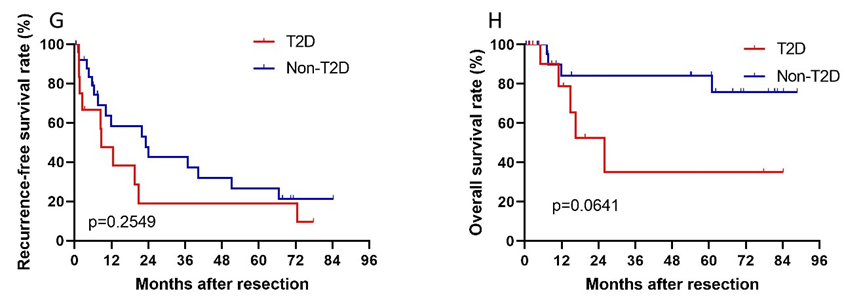


**Figure S4 RFS (I) and OS (J) in MAFLD-HCC patients with HBV infection for subgroup analysis.**


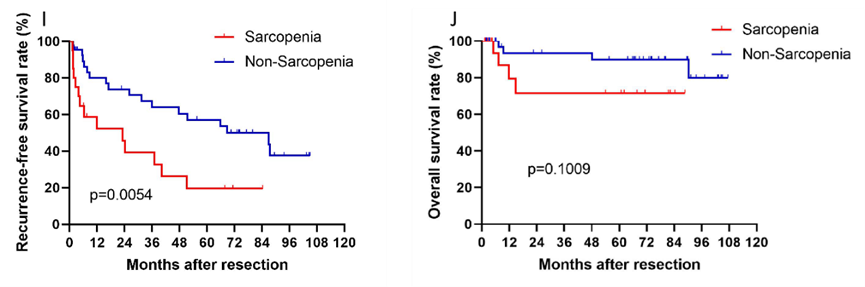

Supplement: Supplementary file 1 [file get_supplementary_file.php]
